# Supplementary material
Source: Research Square preprint supplement (doi:10.21203/rs.3.rs-9647277/v1)
Supplement: Supplementary file 2 [file c28e22d46b7ac1e91c6bf1d7.xlsx]

## Sheet: Sheet1
Supplementary Table S1. Transcript Abundance (TPM) of genes shown in the supplementary figure in Fruit and MCP under 250 PAR and 1000 PAR treatments
Ensemble_ID	Fruit250PAR-TPM	Fruit1000PAR-TPM	MCP250PAR-TPM	MCP1000PAR-TPM	Symbol
Solyc10g044670.3	10.403	8.20033	2.92333	2.17867	SlPHYA
Solyc01g059870.4	1.80767	1.171	7.28567	6.75033	SlPHYB1
Solyc05g053410.4	3.81433	1.80633	2.24967	2.143	SlPHYB2
Solyc02g071260.3	0.396333	0.101	4.31733	3.79167	SlPHYE
Solyc01g097770.4	0.141667	0.0266667	22.6547	25.6017	SlPHOT2
Solyc04g074180.4	10.243	9.137	8.21533	8.77467	SlCRY1a
Solyc12g057040.2	1.18867	0.143667	8.90333	5.935	SlCRY1b
Solyc09g090100.3	10.3483	7.25133	3.97633	3.69067	SlCRY2
Solyc02g070530.4	0.222333	0.153667	1.90567	2.12833	SlKAT1
Solyc06g051920.4	4.87267	15.145	5.47167	4.34333	SlCNGC5
Solyc07g053970.3	0.408	0.473	2.82167	2.08133	SlTPC1
Solyc06g009330.3	0.931	2.416	2.43767	2.73067	SlTPK5
